# Supplementary material for: Drivers of woody plant encroachment over Africa
Source: PubMed Central journal article supplement (PMC5995890; doi:10.1038/s41467-018-04616-8), 2018-06-11
Supplement: 41467_2018_4616_MOESM1_ESM.pdf [file 41467_2018_4616_MOESM1_ESM.pdf]

1  
2  
3  
4  
5

# **Drivers of Woody Plant Encroachment Over Africa**

## **Supplementary information**

Venter et al.

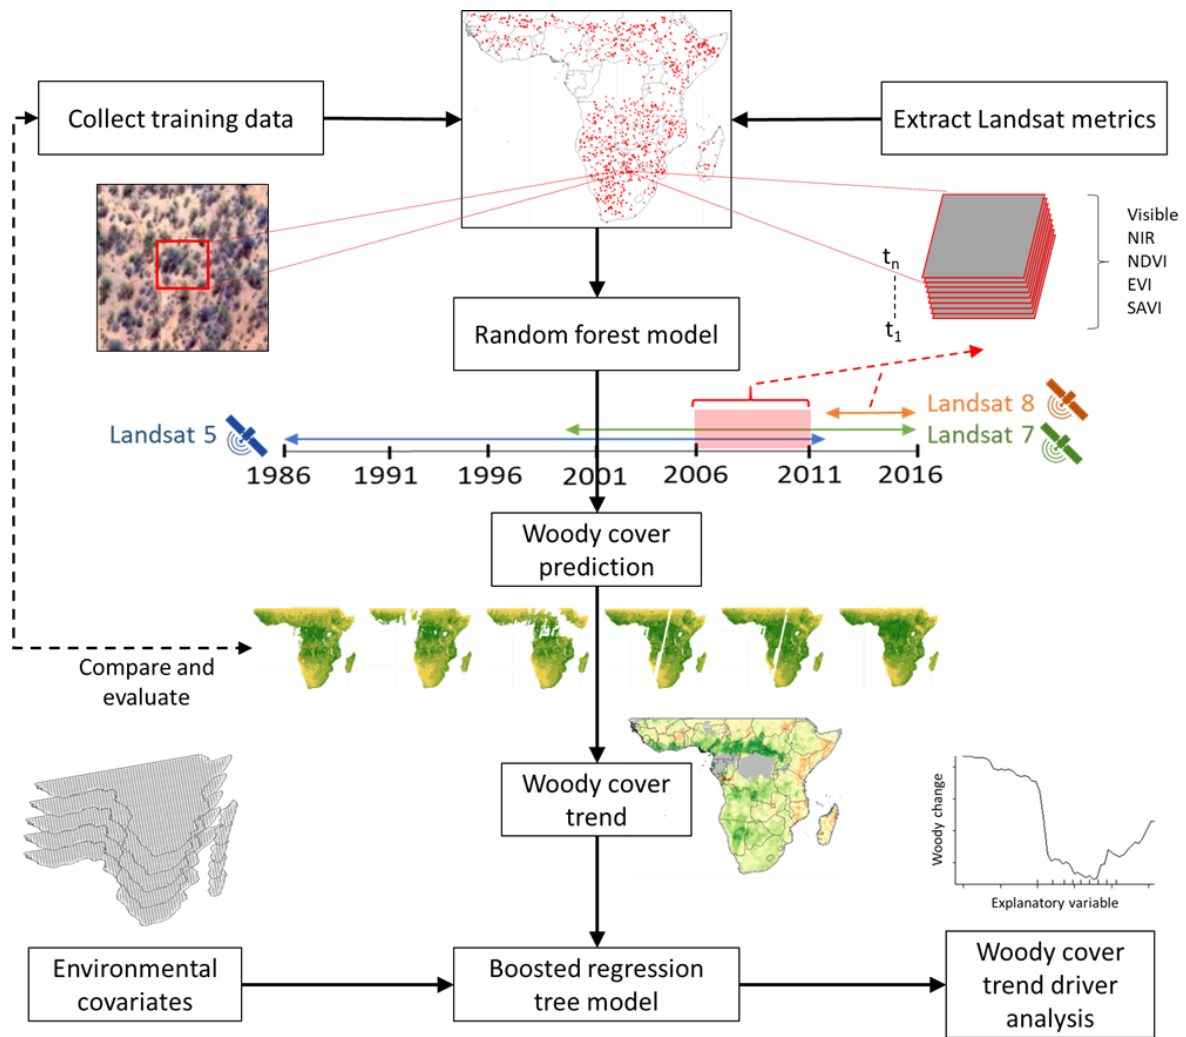

6  
7

8 **Supplementary Figure 1**

9 Data processing flow for woody cover prediction and environmental covariate analysis. Aerial  
10 photograph: Google, DigitalGlobe. Maps constructed in Google Earth Engine <sup>1</sup>.

11  
12

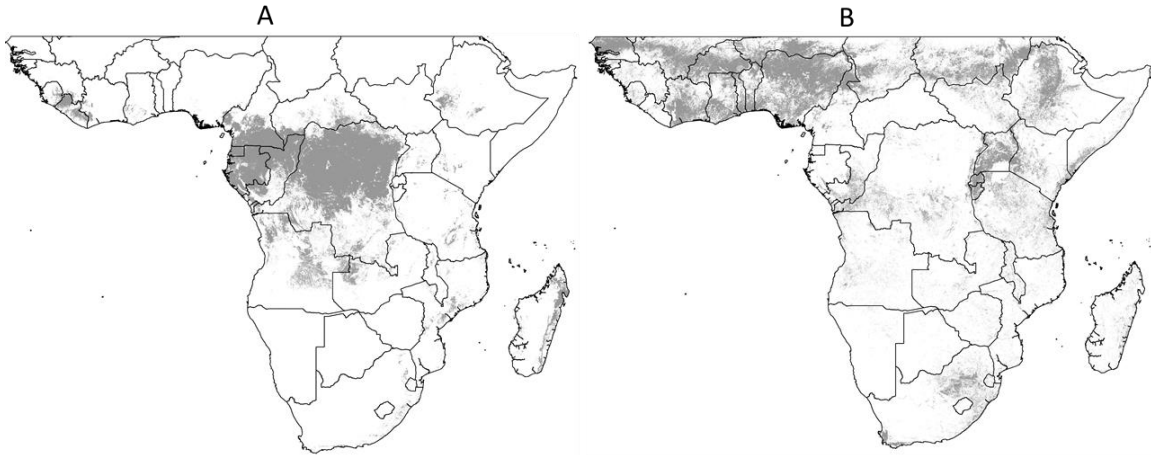

13

14 **Supplementary Figure 2**

15 Data masks, represented in grey, include Landsat-derived forest and forestry cover (A), MODIS-  
16 derived urban, water, wetland, cropland, and natural-cropland mosaics (B). Maps constructed in  
17 Google Earth Engine <sup>1</sup>.

18

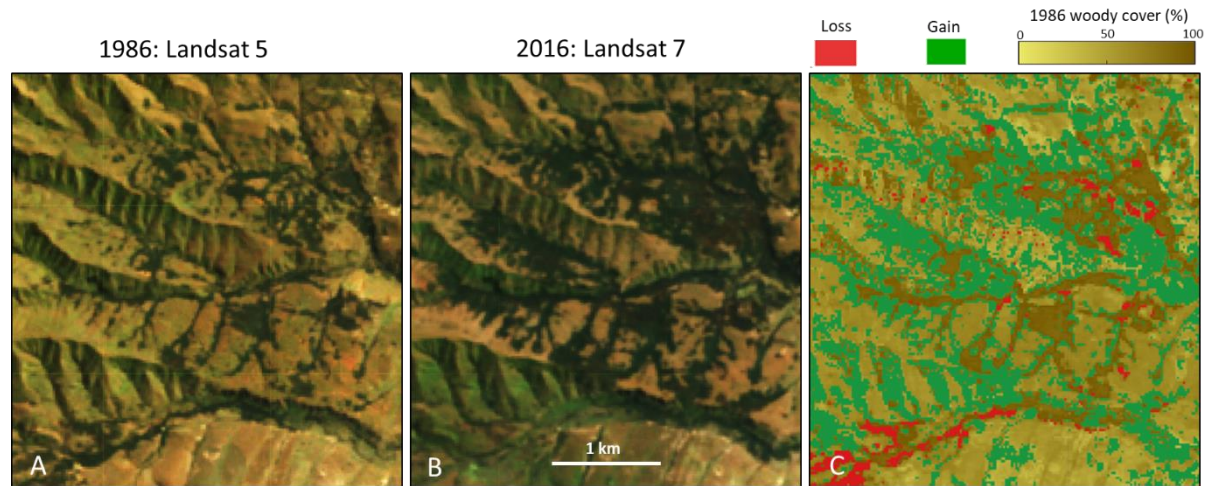

19

20 **Supplementary Figure 3**

21 Landscape-scale example of fractional woody plant cover change. Landsat true-colour  
 22 composites of Mariazell Mission in the Eastern Cape of South Africa are shown for comparison  
 23 over time (A, B). Gain and loss represent areas with > 50% change (C). This communal  
 24 rangeland has been invaded by the exotic *Acacia mearnsii*, however, brush clearing efforts,  
 25 initiated by the Working for Water Programme, and implemented through Conservation South  
 26 Africa with the aim of rehabilitation of grazing capacity, are evident in red. Landsat-5 and -7  
 27 images courtesy of the U.S. Geological Survey.

28

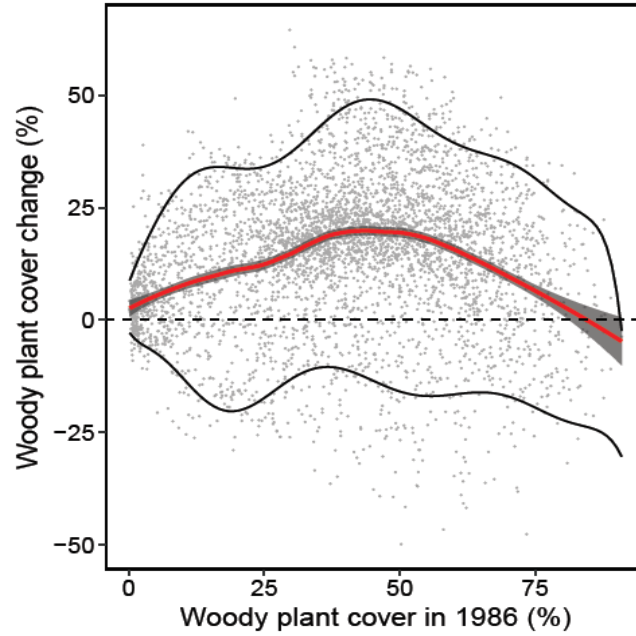

29

30 **Supplementary Figure 4**

31 Woody plant cover change relative to the initial fractional cover in 1986 for each 0.5° grid cell  
32 over sub-Saharan Africa. A loess regression line (red), its 95% confidence intervals (grey  
33 ribbon), and the 5<sup>th</sup> and 95<sup>th</sup> quantile regression lines (black) are indicated.

34

35

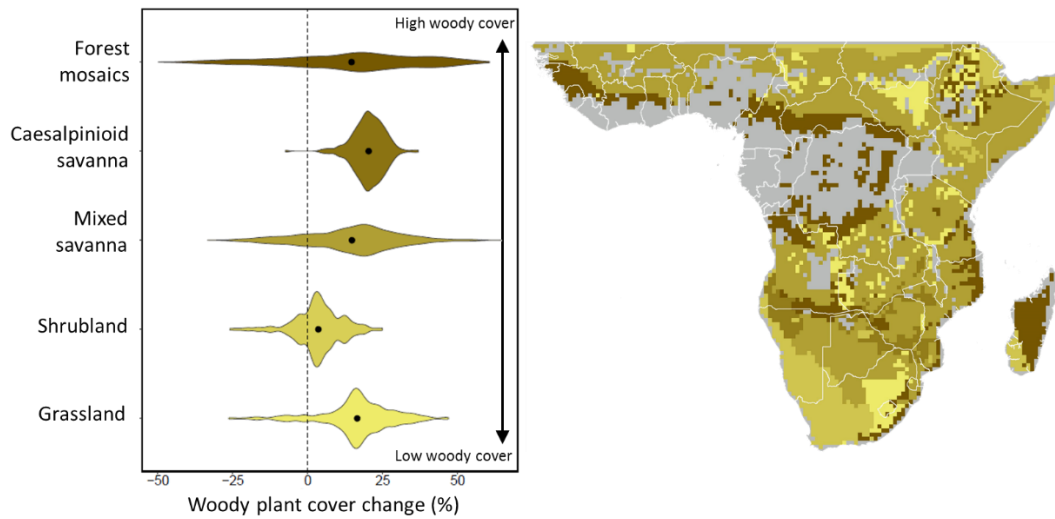

36

37 **Supplementary Figure 5**

38 Woody plant cover trends for different vegetation types (left). Vegetation  
 39 types, plotted spatially for reference (right), are based on those defined by White <sup>2</sup>, and are  
 40 ordered and colored categorically by increasing fractional woody cover. Grey areas were masked  
 41 from the analysis and represent urban, wetland, cropland, and forest (areas >40 % cover by trees  
 42 >5 m). Maps constructed in Google Earth Engine <sup>1</sup>.

43

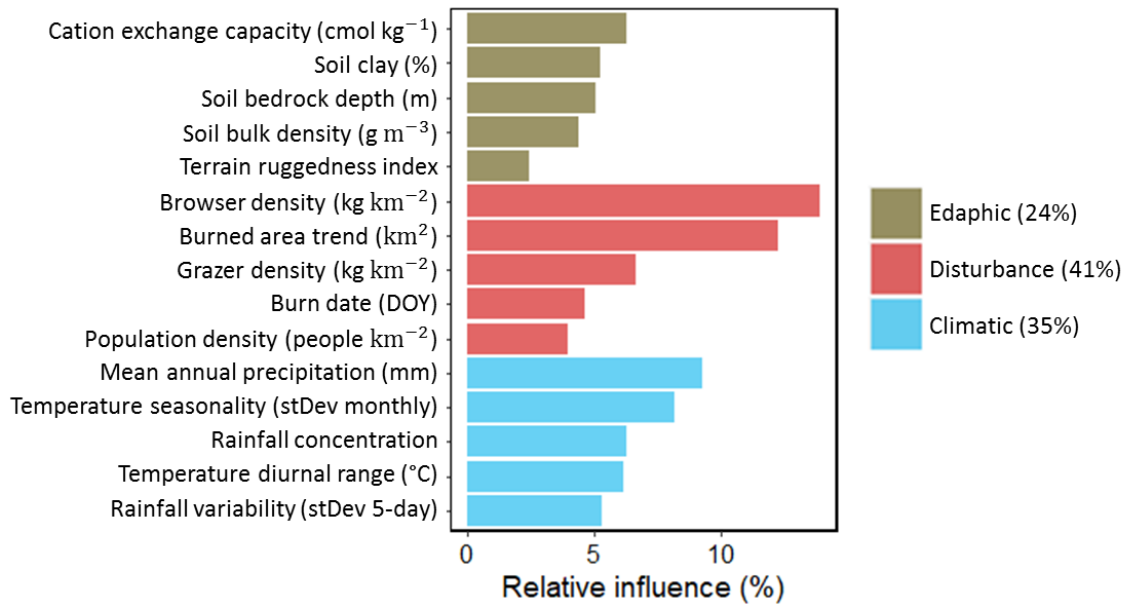

44

45 **Supplementary Figure 6**

46 The percentage contribution of the five most important facilitator variables (edaphic,  
 47 disturbance, and climatic temporal means) as predictors employed in the final boosted regression  
 48 tree model explaining the spatial variation in woody plant cover change. Summed contributions  
 49 are indicated in the colour key. The model was able to explain 75% of the total deviance in  
 50 woody cover change.  
 51

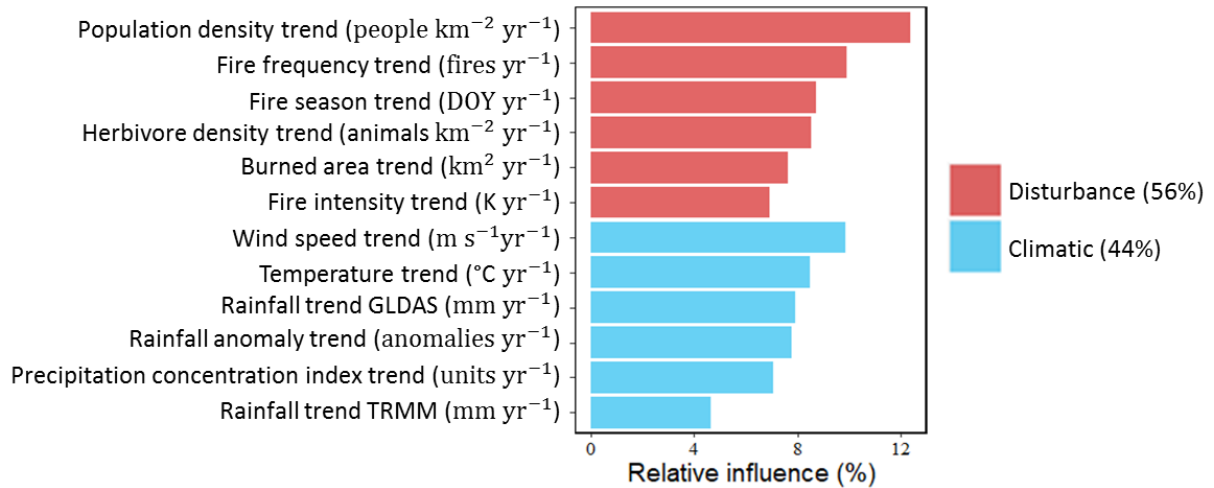

52

53 **Supplementary Figure 7**

54 The percentage contribution of the most important driver variables (climatic and disturbance  
 55 trends) as predictors employed in the final boosted regression tree model explaining the spatial  
 56 variation in woody plant cover change. Summed contributions are indicated in the colour key.  
 57 The model was able to explain 51% of the total deviance in woody cover change.

58

59



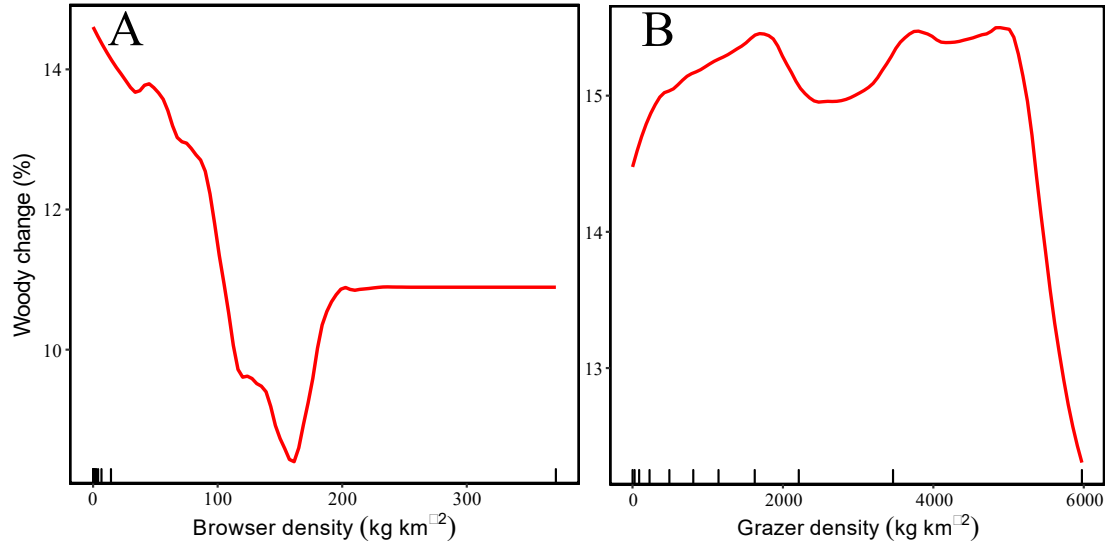

60

61 **Supplementary Figure 8**

62 Boosted regression tree partial dependence of fractional woody cover change on browser (A) and  
 63 grazer (B) densities when accounting for the average effect of all explanatory variables. These  
 64 contributed 8.6 and 5.6% to the final model combining drivers and facilitator variables which  
 65 explained 78% of the deviance in woody cover change. The red line is the smoothed  
 66 representation of the response, with fitted values (model predictions based on the original data)  
 67 for each 0.5° grid cell over sub-Saharan Africa. The trend of the line, rather than the actual  
 68 values, describes the nature of the dependence between response and explanatory variables.  
 69 Small bats on the x-axis represent data deciles.  
 70

71

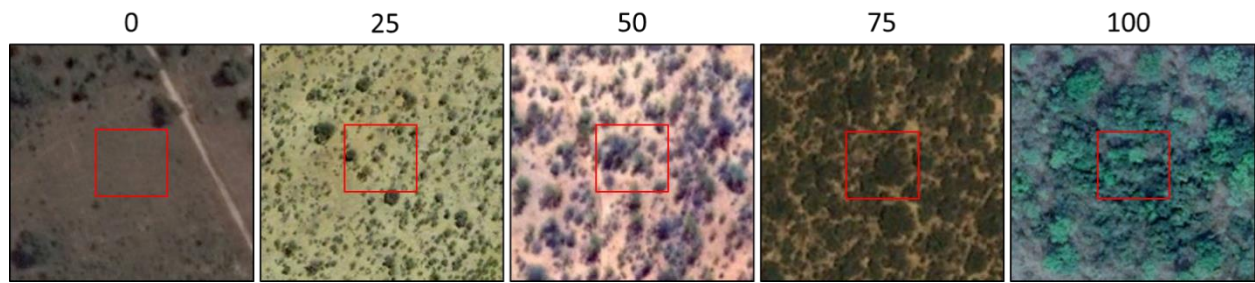

72

73 **Supplementary Figure 9**

74 Google Earth image examples for each fractional woody plant cover (%) category with 30 x 30  
75 m sampling quadrat overlaid in red. Aerial photographs: Google, DigitalGlobe.

76

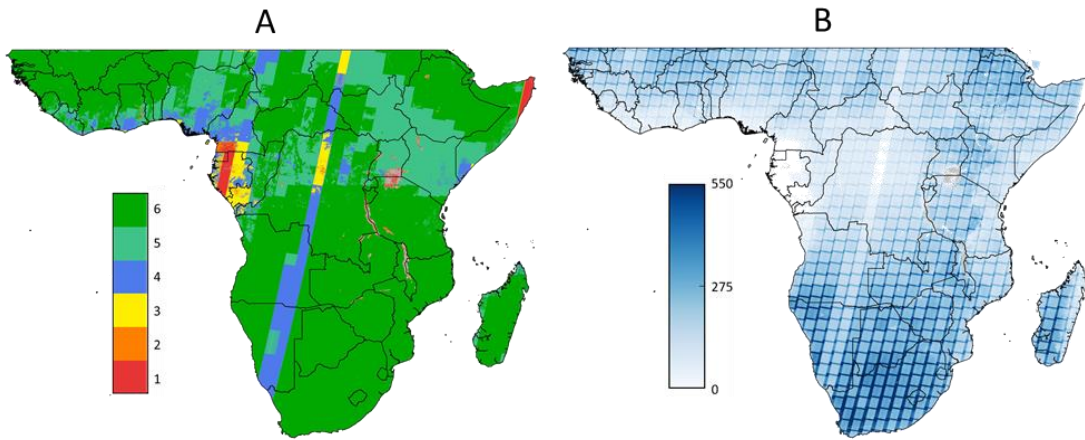

77

78 **Supplementary Figure 10**

79 Quality layers for fractional woody cover change prediction. Number of epochal time-points  
80 available for linear regression (A). Total number of cloud-free Landsat pixels between 1986 and  
81 2016 (B). Maps constructed in Google Earth Engine <sup>1</sup>.

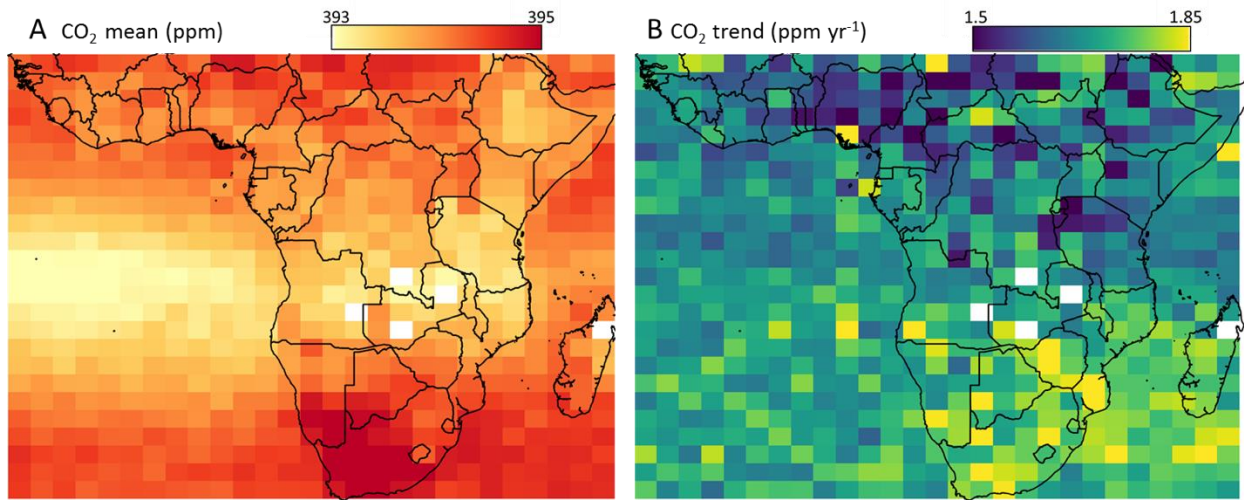

82

83 **Supplementary Figure 11**

84 Mean (A) and trend (B) in mid-troposphere atmospheric CO<sub>2</sub> concentrations (parts per million)  
85 for the period 2009 – 2017. The ranges of the spatial variation in CO<sub>2</sub> means and trends were 2  
86 ppm and 0.35 ppm yr<sup>-1</sup>, respectively. Maps constructed in Google Earth Engine <sup>1</sup>.

87

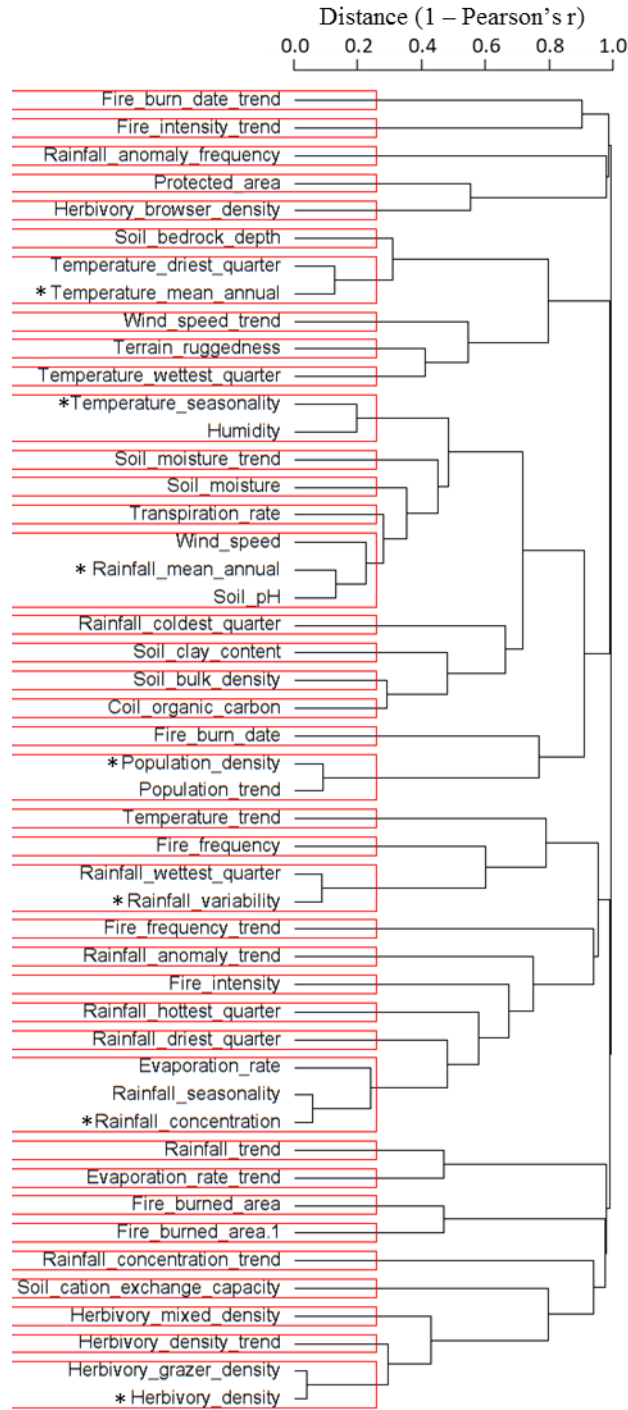

88

89 **Supplementary Figure 12**

90 Collinearity plot of explanatory variables used in the BRT model. Groups of variables that are  
 91 collinear (Pearson's  $r$  of  $> 0.7$ ) are delineated in red. Within collinear groups, one variable  
 92 (identified with an asterisk) was selected prior to model fitting.

93 **Supplementary Table 1**

94 Woody plant cover statistics for African countries derived from data presented in Fig. 1. The  
 95 average trend (slope of the linear regression between 1986 and 2016) of the area undergoing  
 96 significant gains and losses in woody cover should be interpreted relative to the total percentage  
 97 woody cover, average trend and unmasked area (Supplementary Fig. 1) for each country.  
 98

| Country                  | Total           |                             |                                  | Gain                    |                             | Loss                    |                             |
|--------------------------|-----------------|-----------------------------|----------------------------------|-------------------------|-----------------------------|-------------------------|-----------------------------|
|                          | Woody cover (%) | Trend (% yr <sup>-1</sup> ) | Unmasked area (km <sup>2</sup> ) | Area (km <sup>2</sup> ) | Trend (% yr <sup>-1</sup> ) | Area (km <sup>2</sup> ) | Trend (% yr <sup>-1</sup> ) |
| Angola                   | 53              | 0.7                         | 1023879                          | 247131                  | 0.8                         | 28905                   | -0.6                        |
| Benin                    | 42              | 0.6                         | 63464                            | 6929                    | 0.6                         | 374                     | -0.5                        |
| Botswana                 | 28              | 0.8                         | 618648                           | 291435                  | 0.8                         | 6549                    | -0.3                        |
| Burkina Faso             | 19              | 0.4                         | 105059                           | 24446                   | 0.4                         | 2280                    | -0.4                        |
| Burundi                  | 62              | 0.1                         | 7100                             | 546                     | 0.5                         | 405                     | -0.4                        |
| Cameroon                 | 57              | 1.1                         | 199047                           | 27175                   | 1.1                         | 808                     | -0.7                        |
| Central African Republic | 60              | 1.4                         | 535743                           | 221859                  | 1.3                         | 3600                    | -0.4                        |
| Chad                     | 20              | 0.4                         | 504490                           | 59107                   | 0.7                         | 36507                   | -0.3                        |
| Congo                    | 60              | -0.3                        | 71747                            | 2359                    | 0.6                         | 5931                    | -0.7                        |
| Congo DRC                | 62              | 1.0                         | 805462                           | 195762                  | 1.1                         | 27197                   | -0.7                        |
| Djibouti                 | 5               | 0.2                         | 22019                            | 3763                    | 0.2                         | 143                     | -0.2                        |
| Eritrea                  | 11              | 0.0                         | 63511                            | 14375                   | 0.2                         | 5082                    | -0.5                        |
| Ethiopia                 | 34              | 0.4                         | 851864                           | 199166                  | 0.6                         | 34544                   | -0.5                        |
| Gabon                    | 73              | 0.2                         | 19744                            | 243                     | 0.5                         | 89                      | -0.5                        |
| Gambia                   | 39              | 0.5                         | 1115                             | 197                     | 0.6                         | 8                       | -0.6                        |
| Ghana                    | 44              | 0.1                         | 112289                           | 4714                    | 0.9                         | 4156                    | -0.8                        |
| Guinea                   | 58              | 0.5                         | 219488                           | 20913                   | 0.7                         | 4539                    | -0.6                        |
| Guinea-Bissau            | 60              | 0.8                         | 20890                            | 2924                    | 0.9                         | 183                     | -0.6                        |
| Ivory Coast              | 61              | 0.5                         | 155198                           | 16654                   | 0.8                         | 4746                    | -0.7                        |
| Kenya                    | 32              | -0.1                        | 477358                           | 37970                   | 0.4                         | 32216                   | -0.7                        |
| Lesotho                  | 37              | 0.5                         | 34873                            | 15330                   | 0.5                         | 287                     | -0.5                        |
| Liberia                  | 77              | 0.8                         | 35788                            | 4699                    | 0.8                         | 20                      | -0.5                        |
| Madagascar               | 44              | -0.6                        | 492315                           | 28858                   | 0.5                         | 76792                   | -1.0                        |
| Malawi                   | 50              | 0.5                         | 83995                            | 25878                   | 0.6                         | 2730                    | -0.6                        |
| Mali                     | 19              | 0.5                         | 256609                           | 48260                   | 0.5                         | 4149                    | -0.2                        |
| Mauritania               | 4               | 0.3                         | 6760                             | 2104                    | 0.2                         | 43                      | -0.2                        |
| Mozambique               | 60              | 0.3                         | 747550                           | 116220                  | 0.7                         | 53230                   | -0.6                        |
| Namibia                  | 19              | 0.5                         | 886784                           | 254625                  | 0.5                         | 9884                    | -0.2                        |
| Niger                    | 2               | -0.1                        | 207426                           | 15690                   | 0.2                         | 36477                   | -0.2                        |
| Nigeria                  | 44              | 0.8                         | 279679                           | 37073                   | 0.9                         | 3036                    | -0.5                        |
| Rwanda                   | 65              | 0.0                         | 3557                             | 275                     | 0.5                         | 414                     | -0.4                        |

|              |    |      |         |        |     |       |      |
|--------------|----|------|---------|--------|-----|-------|------|
| Senegal      | 27 | 0.6  | 55462   | 8735   | 0.7 | 763   | -0.4 |
| Sierra Leone | 69 | 0.3  | 49381   | 4563   | 0.7 | 2112  | -0.6 |
| Somalia      | 21 | -0.1 | 544493  | 39083  | 0.4 | 79199 | -0.4 |
| South Africa | 28 | 0.4  | 1214440 | 478366 | 0.5 | 31016 | -0.4 |
| South Sudan  | 43 | 1.2  | 518436  | 120047 | 1.1 | 3039  | -0.6 |
| Sudan        | 14 | 0.1  | 596673  | 53714  | 0.5 | 48360 | -0.3 |
| Swaziland    | 58 | 0.7  | 15672   | 5515   | 0.7 | 428   | -0.5 |
| Tanzania     | 55 | 0.6  | 700997  | 175749 | 0.8 | 32055 | -0.6 |
| Togo         | 47 | 0.6  | 27772   | 2407   | 0.8 | 476   | -0.6 |
| Uganda       | 57 | 1.1  | 63329   | 19481  | 1.1 | 764   | -0.4 |
| Zambia       | 57 | 0.5  | 676749  | 148146 | 0.7 | 26399 | -0.6 |
| Zimbabwe     | 46 | 0.7  | 399737  | 146043 | 0.7 | 4638  | -0.6 |

100 **Supplementary Table 2**

101 Internal and external random forest (RF) regression validation accuracies for predicting  
102 fractional woody cover using time-series metrics derived from Landsat satellites. Internal  
103 accuracies are evaluated by the proportion of variance in the response variable explained (PVE)  
104 as well as the mean of square residuals (MSR) produced from cross-validation between in-bag  
105 and out-of-bag samples. External accuracies are evaluated by predicting against a testing dataset  
106 withheld during model construction. The adjusted  $R^2$  of the linear regression between observed  
107 and predicted woody cover is presented.  
108

| RF model       | Internal |       | External       |
|----------------|----------|-------|----------------|
|                | PVE      | MSR   | Adjusted $R^2$ |
| Landsat 5 TM   | 0.935    | 0.152 | 0.915          |
| Landsat 7 ETM+ | 0.917    | 0.161 | 0.924          |
| Landsat 8 OLI  | 0.93     | 0.134 | 0.925          |

109  
110



111 **Supplementary references:**

112

113 1 Gorelick, N. *et al.* Google Earth Engine: Planetary-scale geospatial analysis for everyone. *Remote Sens. Environ.* **202**, 18-27 (2017).

114

115 2 White, F. *Vegetation of Africa – A Descriptive Memoir to Accompany the UNESCO/AETFAT/UNSO Vegetation Map of Africa.* (Unesco, 1983).

116

117
