# Supplementary material for: Drivers of woody plant encroachment over Africa
Source: PubMed Central journal article supplement (PMC5995890; doi:10.1038/s41467-018-04616-8), 2018-06-11
Supplement: 41467_2018_4616_MOESM2_ESM.pdf [file 41467_2018_4616_MOESM2_ESM.pdf]

**Editorial Note:** This manuscript has been previously reviewed at another journal that is not operating a transparent peer review scheme. This document only contains reviewer comments and rebuttal letters for versions considered at *Nature Communications*.

REVIEWERS' COMMENTS:

Reviewer #1 (Remarks to the Author):

I have reread the manuscript several times, and have found it a useful piece of work and I recommend publication. The sheer scale of the data makes it a very useful piece of work. It also reads much more smoothly and I am satisfied that the authors have tried to achieve a more balanced argument. The figures are very helpful and clear and provide much of the detail.
